# Supplementary material
Source: publisher site journal article supplement (https://www.dovepress.com/article/402850)
Supplement: Supplementary file 1 [file get_supplementary_file.php]

# Appendix 1

## The 17-item scale of college students’ learning engagement developed by Schaufeli et al. in 2002

**Learning vigor** (Items 1-6)

**Learning dedication** (Items 7-11)

**Learning absorption** (Items 12-17)

1. When I get up in the morning, I feel like going to class.

2. When I am studying, I feel bursting with energy.

3. I always persevere when my studies are concerned, even things don’t go well.

4. I can continue studying for a very long period at a time.

5. I am very mentally resilient when my studies are concerned.

6. I feel strong and vigorous when I am studying or going to class.

7. Studying to me is challenging.

8. Studying inspires me.

9. I am enthusiastic about my studies.

10. I am proud of my studies.

11. I find my studies full of meaning and purpose.

12. When I am studying, I forget everything else around me.

13. Time flies when I am studying.

14. I get carried away when I am studying.

15. It is difficult to detach myself from my studies.

16. I am immersed in my studies.

17. I feel happy when I am studying intensely.

# Appendix 2

## The 14-item CTLOS-S developed by our study based on Gelfand et al.’s research

**Tolerance orientation for non-learning-behavior in class** (Items 1-7)

**Strength orientation of learning-behavior norms in class** (Items 8-11)

**Strength orientation of social norms in the generalized macro-context** (Items 12-14)

1. Students could do things unrelated to course learning in class. (Reverse)

2. Students could talk with each other in class. (Reverse)

3. Students could listen to music with headphones in class. (Reverse)

4. Students could use mobile-phone in class. (Reverse)

5. Students could eat or drink something in class. (Reverse)

6. Students could laugh loudly in class. (Reverse)

7. Students could learn other courses in the class of a course. (Reverse)

8. Students should actively participate in class discussions.

9. Students should finish their after-class assignments seriously.

10. Students should listen attentively in class.

11. Students should come to the classroom to have classes on time.

12. Most people in our society agree upon what behaviors are appropriate or inappropriate in most situations.

13. There are clear expectations for how we act in most situations.

14. There are many social norms we should abide by in our society.
